# Supplementary material for: Evaluation of [18F]AlF-EMP-105 for Molecular Imaging of C-Met
Source: MDPI journal article supplement (doi:10.3390/pharmaceutics15071915), 2023-07-10
Supplement: s1 [file s1]

# Supplementary Information

## Evaluation of [ $^{18}\text{F}$ ]AIF-NOTA-EMP-105 for Molecular Imaging of C-Met

Jin Hui Teh <sup>1,†</sup>, Ala Amgheib <sup>2,†</sup>, Ruisi Fu <sup>2</sup>, Chris Barnes <sup>2</sup>, Joel Abrahams <sup>2</sup>, Ali Ashek <sup>2</sup>, Ning Wang <sup>2</sup>, Zixuan Yang <sup>2</sup>, Muneera Mansoorudeen <sup>2</sup>, Nicholas J. Long <sup>1</sup> and Eric O. Aboagye <sup>2,\*</sup>

<sup>1</sup> Department of Chemistry, Molecular Sciences Research Hub, Imperial College London, London W12 0BZ, UK; jin.teh15@imperial.ac.uk (J.H.T.); n.long@imperial.ac.uk (N.J.L.)

<sup>2</sup> Department of Surgery and Cancer, Imperial Centre for Translational and Experimental Medicine, Imperial College London, London W12 0NN, UK; a.amgheib@imperial.ac.uk (A.A.); ruisi.fu14@imperial.ac.uk (R.F.); chris.barnes@imperial.ac.uk (C.B.); joel.abrahams@imperial.ac.uk (J.A.); m.ashek@imperial.ac.uk (A.A.); n.wang16@imperial.ac.uk (N.W.); zixuan.yang18@imperial.ac.uk (Z.Y.); m.mansoorudeen22@imperial.ac.uk (M.M.)

\* Correspondence: eric.aboagye@imperial.ac.uk

† These authors contributed equally to this work.

### Radiochemistry

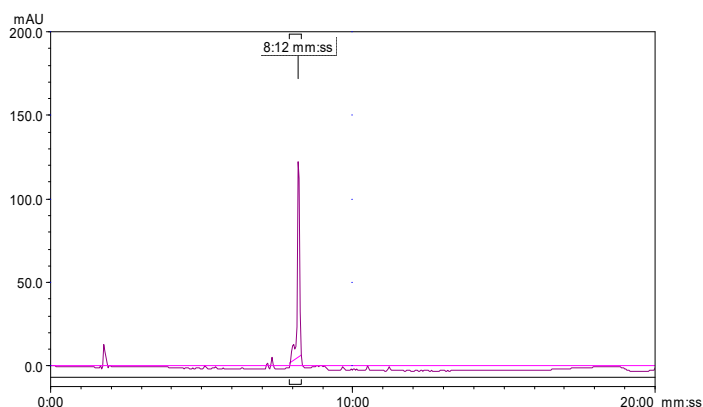

**Figure S1:** Reference UV-HPLC chromatogram of NOTA-EMP-105

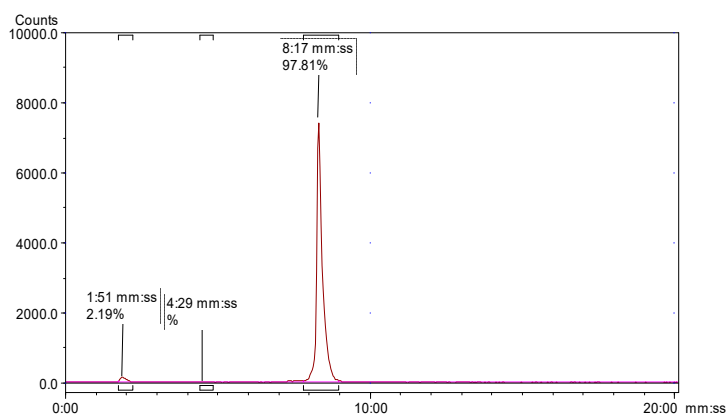

**Figure S2:** Radio-HPLC chromatogram of purified [ $^{18}\text{F}$ ]AIF-NOTA-EMP-105

### ***In vitro* stability studies**

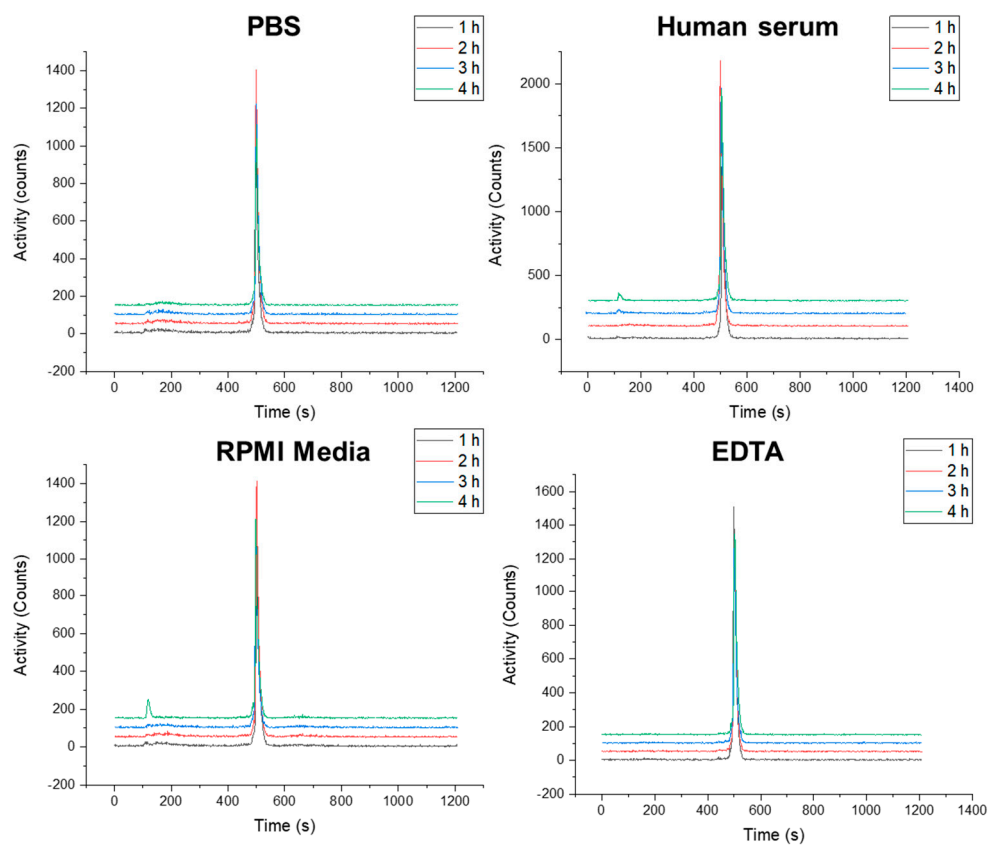

**Figure S3:** Stacked radio-HPLC chromatograms of [ $^{18}\text{F}$ ]AIF-NOTA-EMP-105 after incubation in PBS, human serum, RPMI media and EDTA at 37 °C

**Table S1:** Percentage of [ $^{18}\text{F}$ ]AIF-NOTA-EMP-105 remaining after incubation in at 37 in PBS, human serum, RPMI media and EDTA °C.

| Time (h) | PBS (%) | Human Serum (%) | RPMI (%) | EDTA (%) |
|----------|---------|-----------------|----------|----------|
| 1        | 98      | 99              | 97       | 99       |
| 2        | 97      | 99              | 97       | 99       |
| 3        | 95      | 98              | 97       | 98       |
| 4        | 95      | 97              | 92       | 98       |

## Radiolysis tests

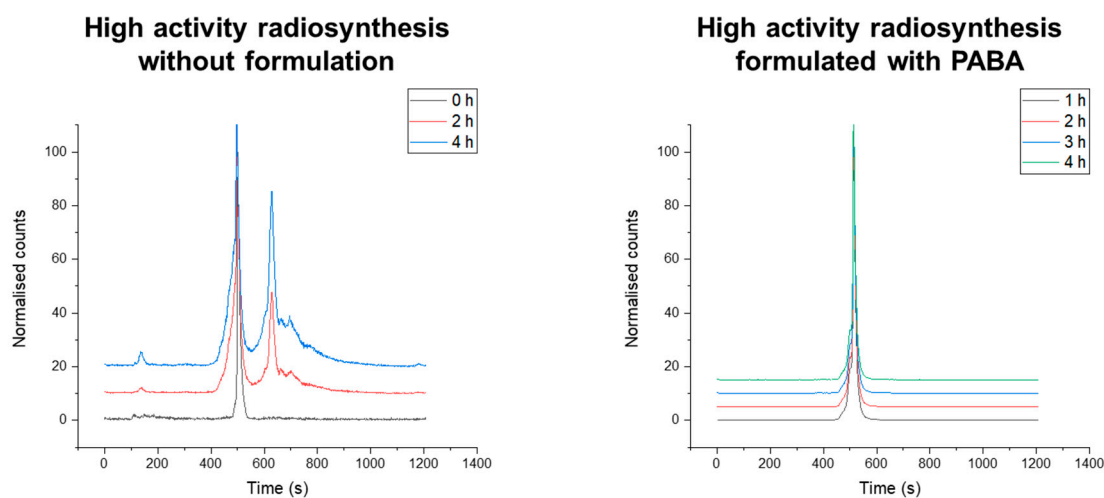

**Figure S4:** Stacked radio-HPLC chromatograms of >2 GBq of [ $^{18}\text{F}$ ]AIF-NOTA-EMP-105: Left: eluted from cartridge or; Right: formulated in PBS solution containing 5 mg/mL (10 mL) of PABA (4-aminobenzoic acid) and 7.5% EtOH.

## Calibration curve for molar activity determination

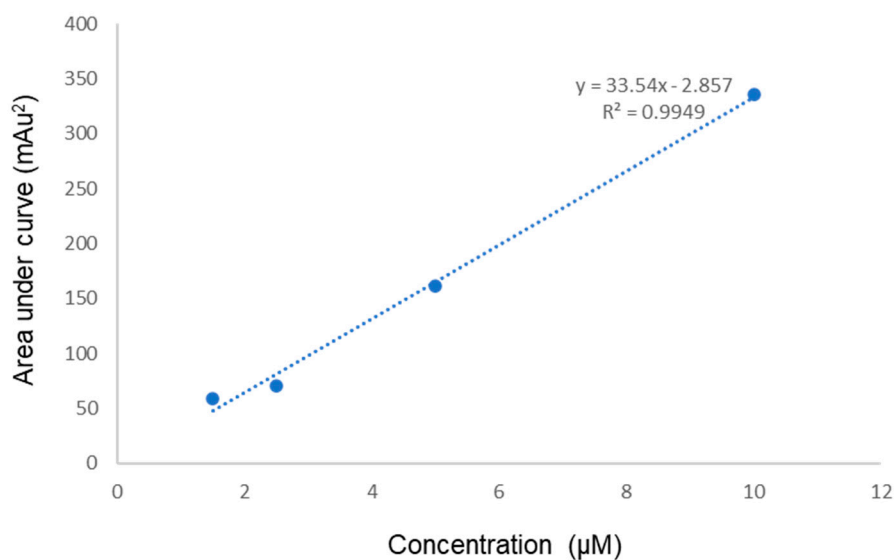

**Figure S5:** Calibration curve for molar activity calculation, obtained using EMP-105. Data expressed as mean of 3 replicates.
